# Supplementary material
Source: HighWire-hosted journal article supplement (https://erj.ersjournals.com/content/61/4/2200604)

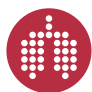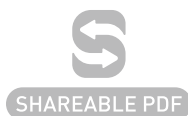

# Inhibition of MRTF activation as a clinically achievable anti-fibrotic mechanism for pirfenidone

Hsiao-Yen Ma<sup>1</sup>, Jason A. Vander Heiden<sup>2</sup>, Salil Uttarwar<sup>2</sup>, Ying Xi<sup>1,3</sup>, Elsa-Noah N'Diaye<sup>1,4</sup>, Ryan LaCanna<sup>1</sup>, Patrick Caplazi<sup>5,6</sup>, Sarah Gierke<sup>5</sup>, John Moffat<sup>7</sup>, Paul J. Wolters<sup>8</sup> and Ning Ding<sup>1</sup>

<sup>1</sup>Department of Discovery Immunology, Genentech, South San Francisco, CA, USA. <sup>2</sup>Department of OMNI Bioinformatics, Genentech, South San Francisco, CA, USA. <sup>3</sup>School of Life Science and Technology, ShanghaiTech University, Shanghai, China. <sup>4</sup>Gilead Sciences, Foster City, CA, USA. <sup>5</sup>Department of Pathology, Genentech, South San Francisco, CA, USA. <sup>6</sup>AbbVie, South San Francisco, CA, USA. <sup>7</sup>Department of Biochemical and Cellular Pharmacology, Genentech, South San Francisco, CA, USA. <sup>8</sup>Department of Medicine, University of California, San Francisco, CA, USA.

Corresponding author: Ning Ding ([ding.ning@gene.com](mailto:ding.ning@gene.com))

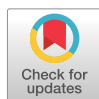

Shareable abstract (@ERSpublications)

**Inhibition of MRTF activation is a clinically achievable anti-fibrotic mechanism for pirfenidone**  
<https://bit.ly/3jEINQu>

**Cite this article as:** Ma H-Y, Vander Heiden JA, Uttarwar S, *et al.* Inhibition of MRTF activation as a clinically achievable anti-fibrotic mechanism for pirfenidone. *Eur Respir J* 2023; 61: 2200604 [DOI: 10.1183/13993003.00604-2022].

This single-page version can be shared freely online.

Copyright ©The authors 2023.

This version is distributed under the terms of the Creative Commons Attribution Non-Commercial Licence 4.0. For commercial reproduction rights and permissions contact [permissions@ersnet.org](mailto:permissions@ersnet.org)

This article has an editorial commentary:  
<https://doi.org/10.1183/13993003.00240-2023>

Received: 24 March 2022  
Accepted: 14 Dec 2022

## Abstract

**Background** Idiopathic pulmonary fibrosis (IPF) is a progressive fibrotic disease characterised by aberrant fibroblast/myofibroblast accumulation and excessive collagen matrix deposition in the alveolar areas of lungs. As the first approved IPF medication, pirfenidone (PFD) significantly decelerates lung function decline while its underlying anti-fibrotic mechanism remains elusive.

**Methods** We performed transcriptomic and immunofluorescence analyses of primary human IPF tissues.

**Results** We showed that myocardin-related transcription factor (MRTF) signalling is activated in myofibroblasts accumulated in IPF lungs. Furthermore, we showed that PFD inhibits MRTF activation in primary human lung fibroblasts at clinically achievable concentrations (half-maximal inhibitory concentration 50–150 µM, maximal inhibition >90%, maximal concentration of PFD in patients <100 µM). Mechanistically, PFD appears to exert its inhibitory effects by promoting the interaction between MRTF and actin indirectly. Finally, PFD-treated IPF lungs exhibit significantly less MRTF activation in fibroblast foci areas than naïve IPF lungs.

**Conclusions** Our results suggest MRTF signalling as a direct target for PFD and implicate that some of the anti-fibrotic effects of PFD may be due to MRTF inhibition in lung fibroblasts.

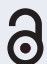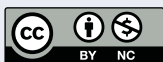

Supplement: inline-supplementary-material-2 [file inline-supplementary-material-2.pdf]
