# Supplementary material
Source: HighWire-hosted journal article supplement (https://erj.ersjournals.com/content/61/4/2200604)
Supplement: inline-supplementary-material-1 [file inline-supplementary-material-1.pdf]

# **Inhibition of MRTF activation as a clinically achievable anti-fibrotic mechanism for Pirfenidone**

**Supplementary material**

**Figure S1. Flow sorting strategy for human lung mesenchymal cells.**

(A) Representative flow plot showing sorting strategy and percentage of populations in normal human lungs. (B) COL1A1, EPCAM and CD31 expression in freshly sorted mesenchymal cells (CD45<sup>-</sup>EPCAM<sup>-</sup>CD31<sup>-</sup>), epithelial cells (EPCAM<sup>+</sup>) and endothelial cells (CD31<sup>+</sup>) from normal and IPF lungs.

# Figure S1

**A**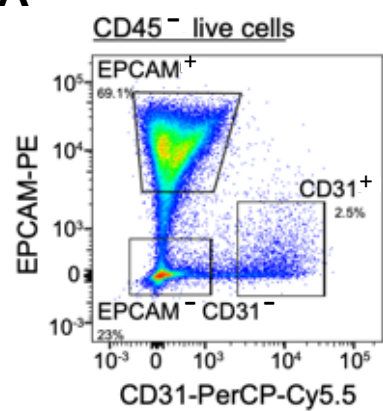**B**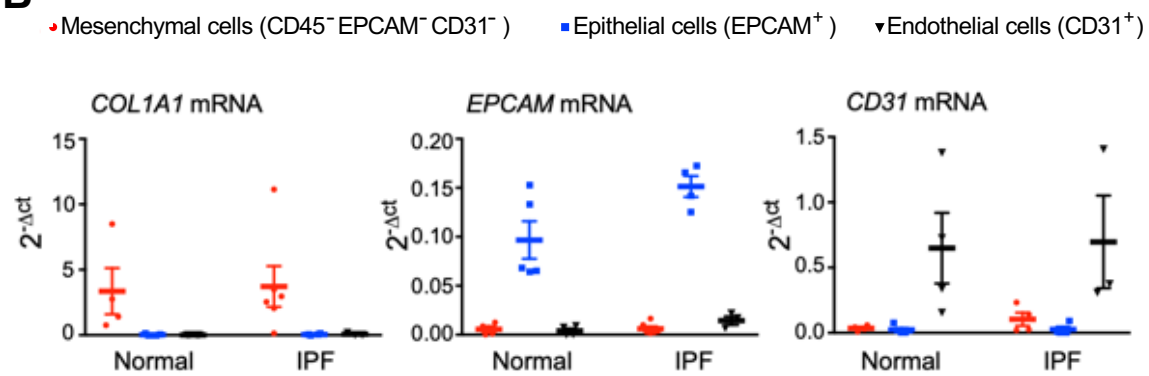

**Figure S2. Enrichment of MRTF signature in a larger IPF cohort.**

(A) Density fit of  $\log_2$  fold-change distributions of IPF vs normal lungs. Separate distributions are shown for MRTF response genes (MRTF signature) and all other genes with expression levels passing quality control (Background). The displayed density fit is truncated at the bounds of the observed  $\log_2$  fold-change values within each category of genes.  $p < 0.0001$ , MRTF signature  $\neq$  Background. (B) Violin plot of MRTF signature in normal and IPF lungs (Normal lungs,  $n = 26$ ; IPF lungs,  $n = 46$ ).  $p$  value is calculated using one-way ANOVA. (C) Unsupervised hierarchical clustering analysis of MRTF signature gene expression in IPF ( $n = 46$ ) and normal lungs ( $n = 26$ ).

Figure S2

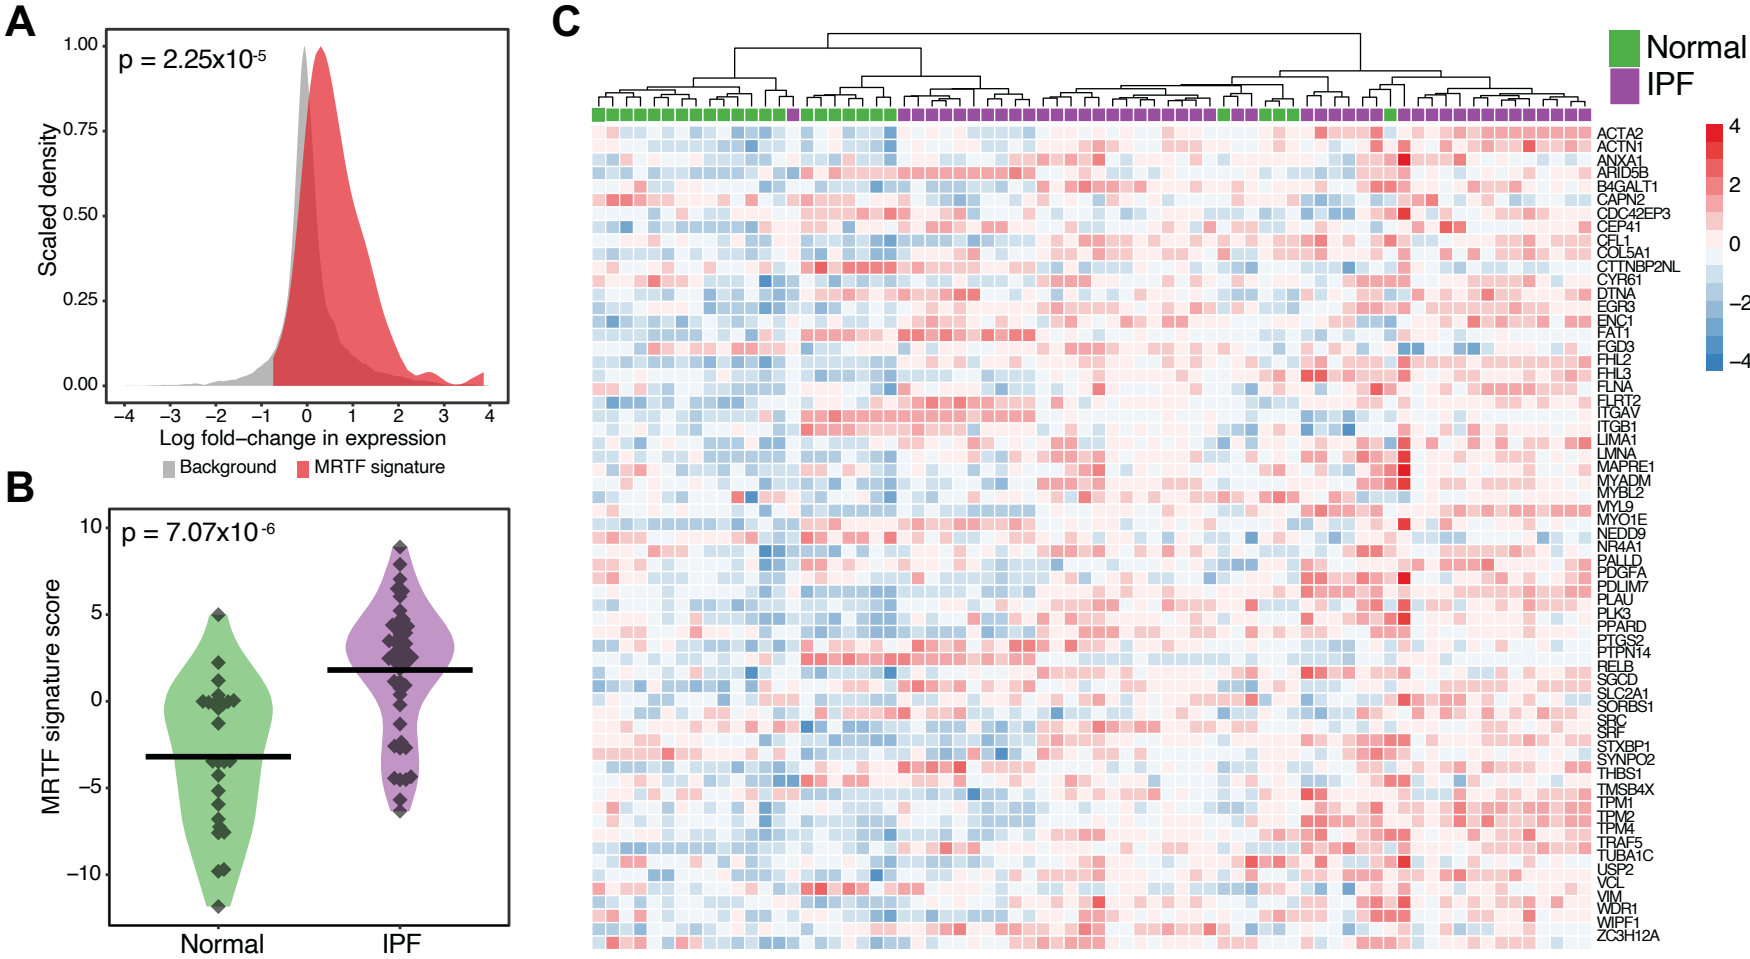

**Figure S3. PFD does not affect collagen expression and cell viability in hLFs.**

(A) RT-qPCR validation of PFD inhibition on COL1A1, COL1A2 and COL3A1 expression in normal and IPF human lung fibroblasts. (B) Normal and IPF lung fibroblasts were treated with PFD at the indicated concentrations for 48 hours followed by CellTiter-Glo assay. PFD concentration: 1mM, n = 3 biological replicates.

Figure S3

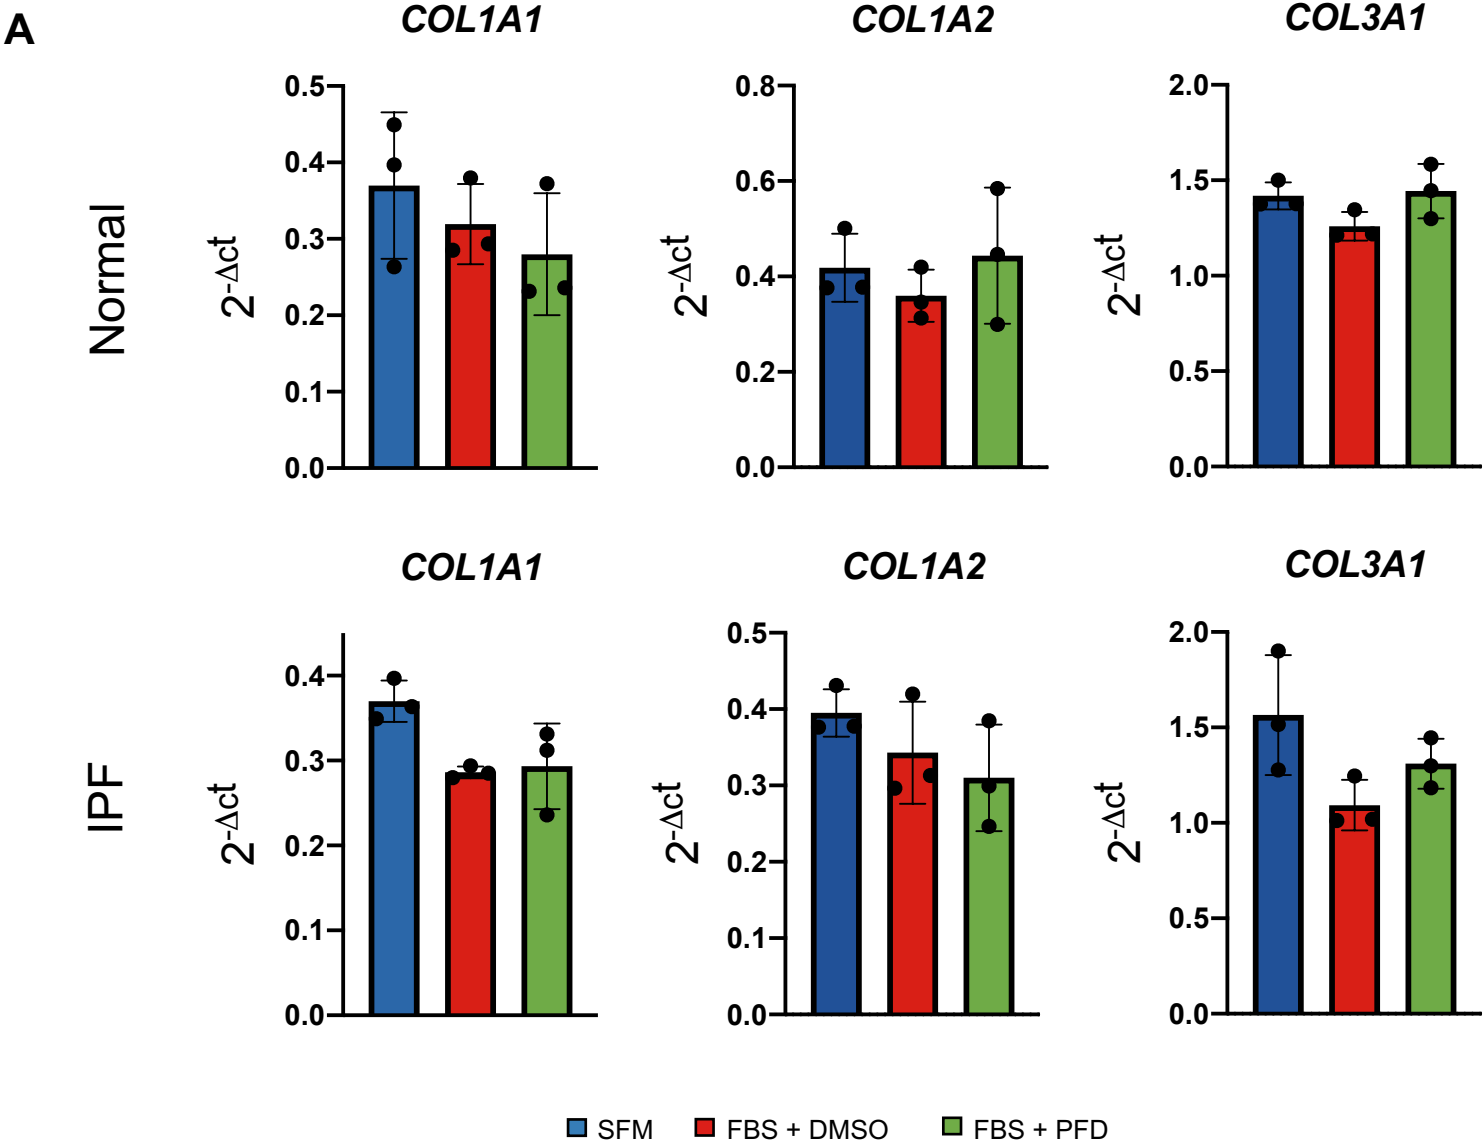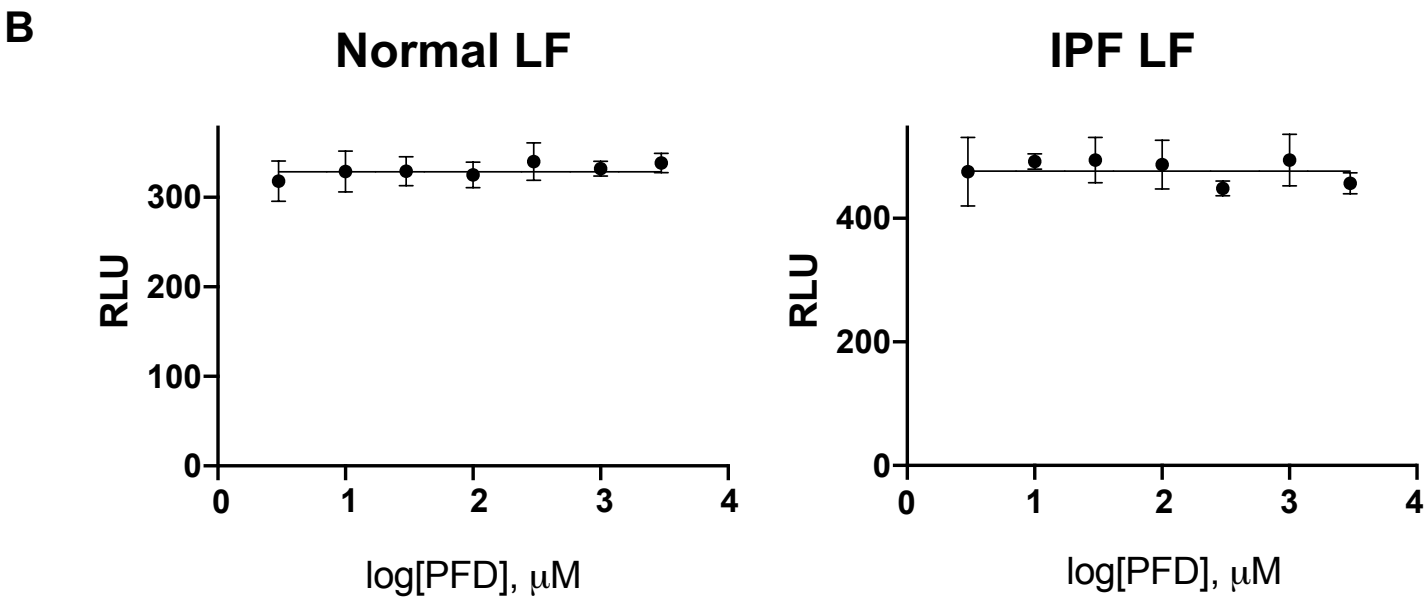

**Figure S4. PFD does not inhibit serum induced MRTFA nuclear translocation in non-fibroblastic cells.**

(A-F) Representative western blot of MRTFA in WCE (top panel) and nuclear fractions (bottom panel) in A549 cells (A), MLE12 mouse alveolar epithelial cells (B), HL60-derived neutrophil-like cells (C), THP1-derived DC-like cells (D), U937-derived macrophage-like cells (E) and primary human lung artery endothelial cells (F) under indicated conditions. PFD concentration: 1mM. YY1, loading control for nuclear fractions.  $\beta$ -actin, loading control for WCE. Similar results were seen in three independent experiments.



**Figure S4**

**A**

**A549 cells**

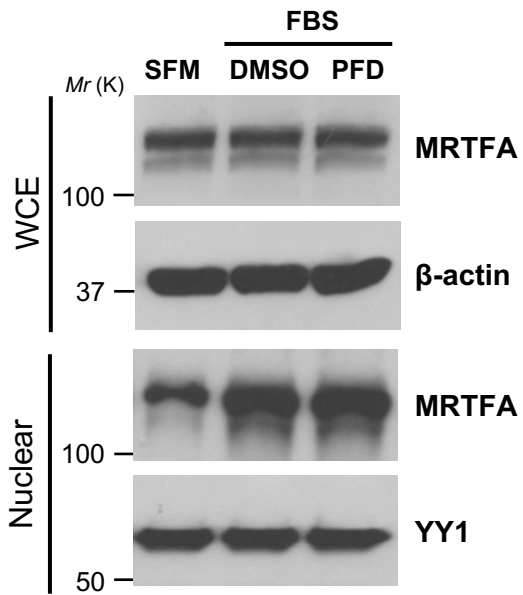

**B**

**MLE12 cells**

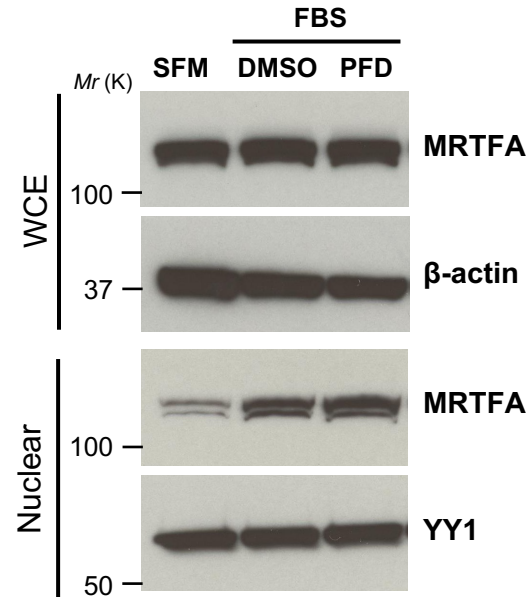

**C**

**HL60-derived neutrophil-like cells**

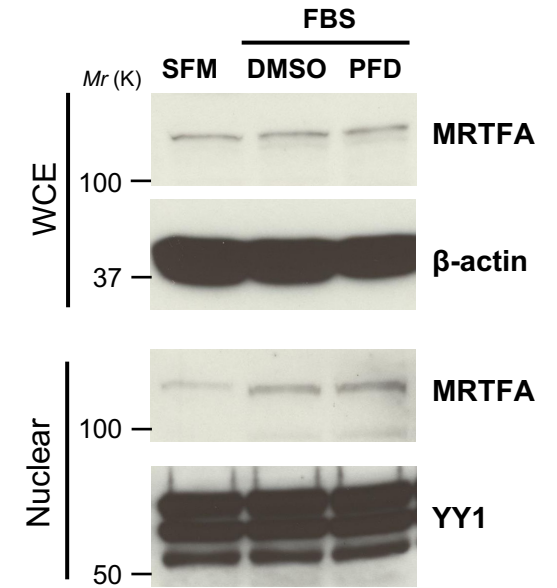

**D**

**THP1-derived DC-like cells**

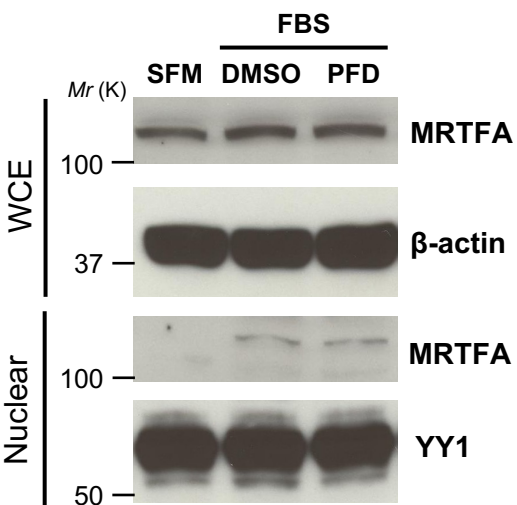

**E**

**U937-derived macrophage-like cells**

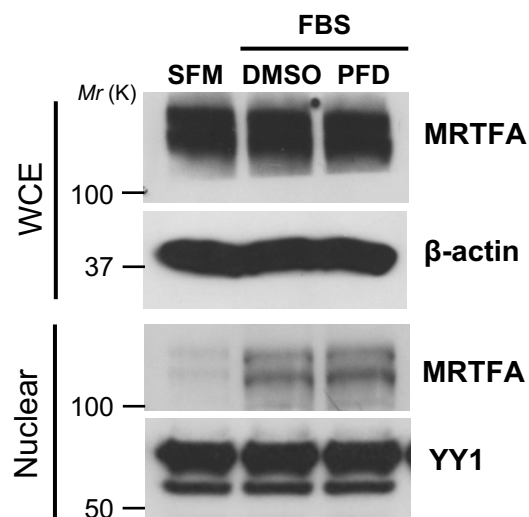

**F**

**Primary human artery endothelial cells**

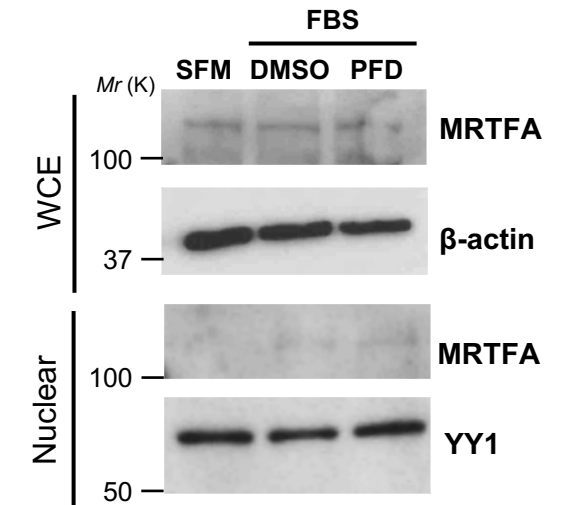

**Figure S5. Transcriptomic analysis of PFD inhibitory effects on MRTF signaling in IPF LFs.**

(A) Heatmap showing relative expression of MRTF, TCF and Hippo target genes in IPF human lung fibroblasts treat with or without 1mM PFD. n = 3/group. (B) Top GO biological processes enriched in the genes suppressed by PFD in 20% FBS stimulated IPF human lung fibroblasts.

Fig S5. Transcriptomics analyses of PFD effects on IPF LFs

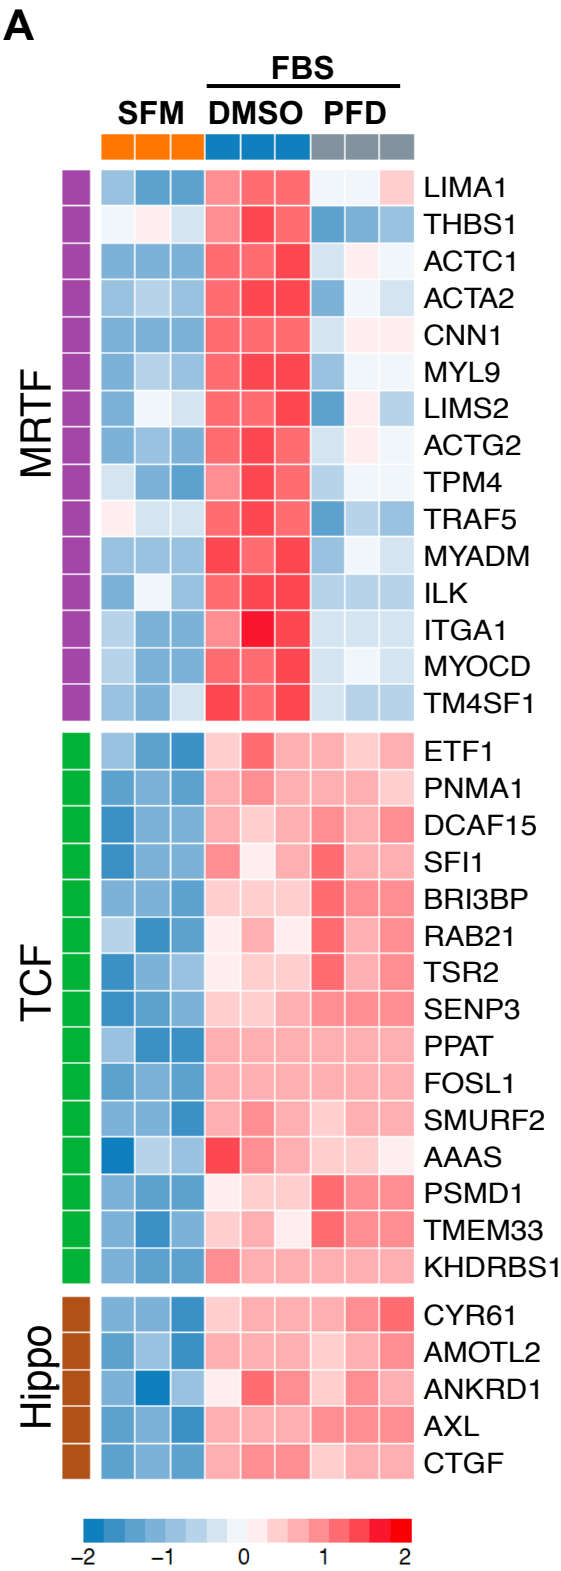

**B**

PFD suppressed genes ( $p\text{-adj.} < 0.05$ )

| Description                               | $-\text{Log}_{10}(q)$ |
|-------------------------------------------|-----------------------|
| Cell motility                             | 17.36                 |
| Biological Adhesion                       | 15.98                 |
| Regulation of cellular component movement | 13.65                 |
| Cell projection organization              | 12.34                 |
| Cell morphogenesis                        | 12.10                 |
| Cytoskeleton organization                 | 11.03                 |
| Actin filament based process              | 10.11                 |
| Extracellular structure organization      | 8.20                  |

**Figure S6. NTD does not inhibit serum induced MRTF target gene expression in hLFs.**

MRTF target gene expression in normal and IPF lung fibroblasts treated with DMSO, PFD (1mM) or NTD (1 $\mu$ M) in the presence or absence of 20% FBS. n = 3 biological replicates.

Figure S6

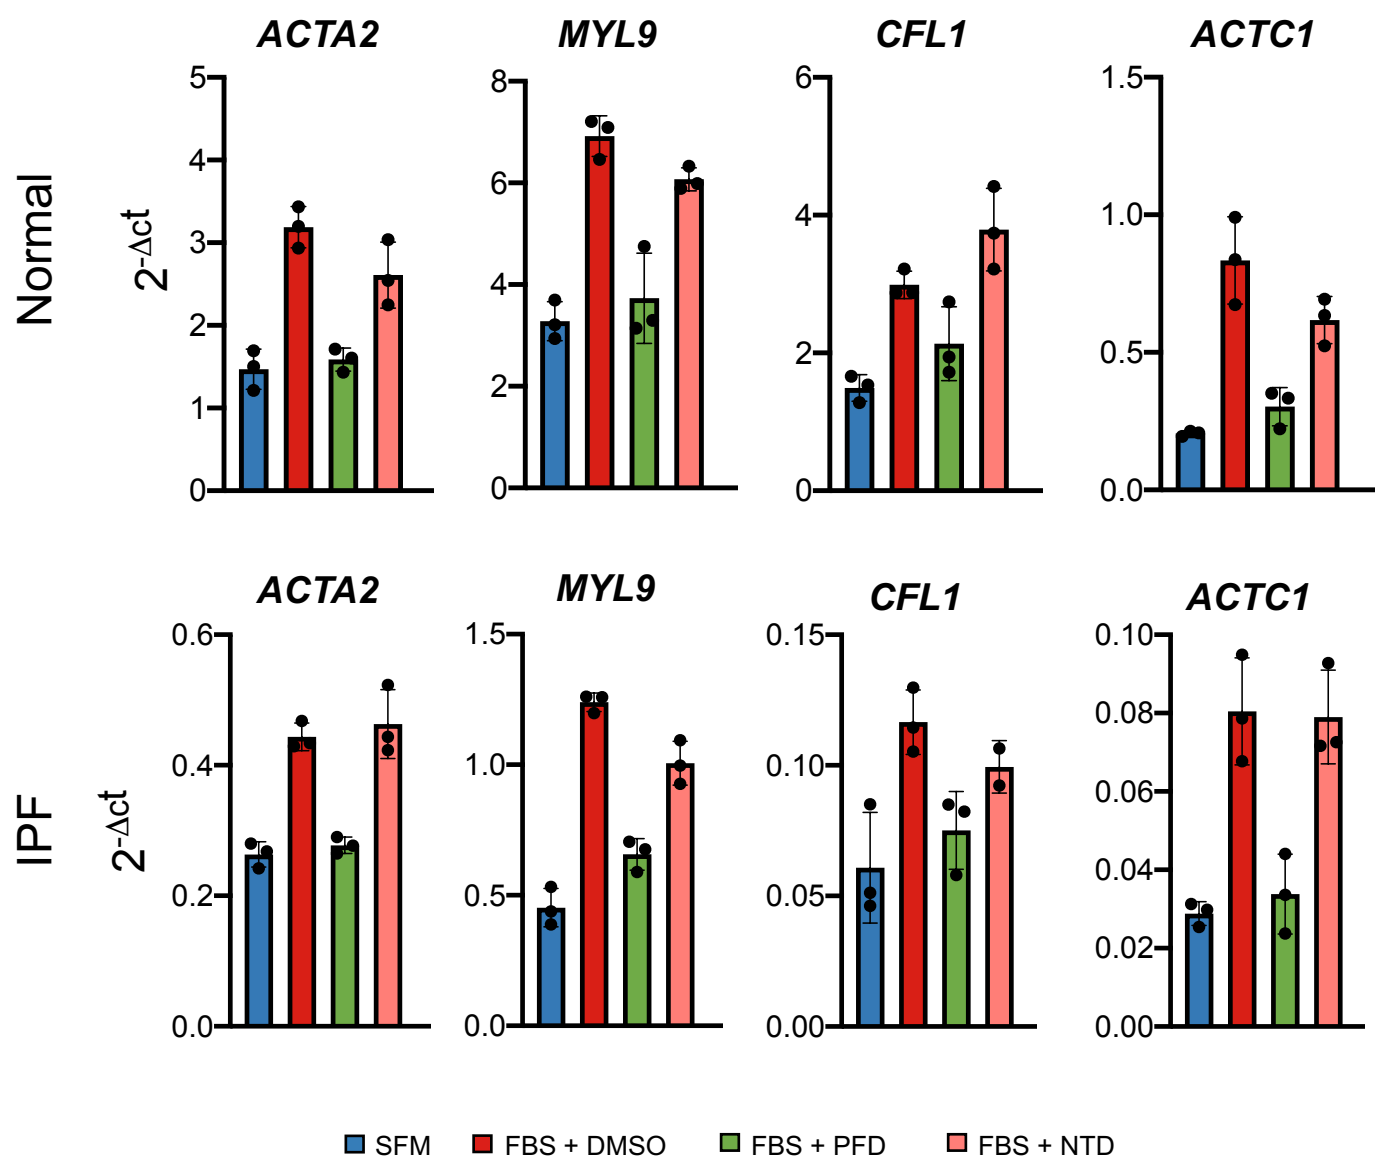

**Figure S7. Neither PFD nor NTD impacts MRTF activation in EPCAM+ epithelial cells in human IPF lungs.**

(A) Representative images of MRTFA and EPCAM immunofluorescence signal in naïve and PFD- or NTD-treated IPF lung sections, scale bar 20µm. (B) Nuclear/cytoplasmic distribution of MRTFA in EPCAM+ epithelial cells (n=10 for IPF, n=10 for PFD-treated, n=10 for NTD-treated). Data represents mean  $\pm$  standard deviation (SD) error. Statistical analysis using one-way ANOVA. ns, not significant.

Figure S7

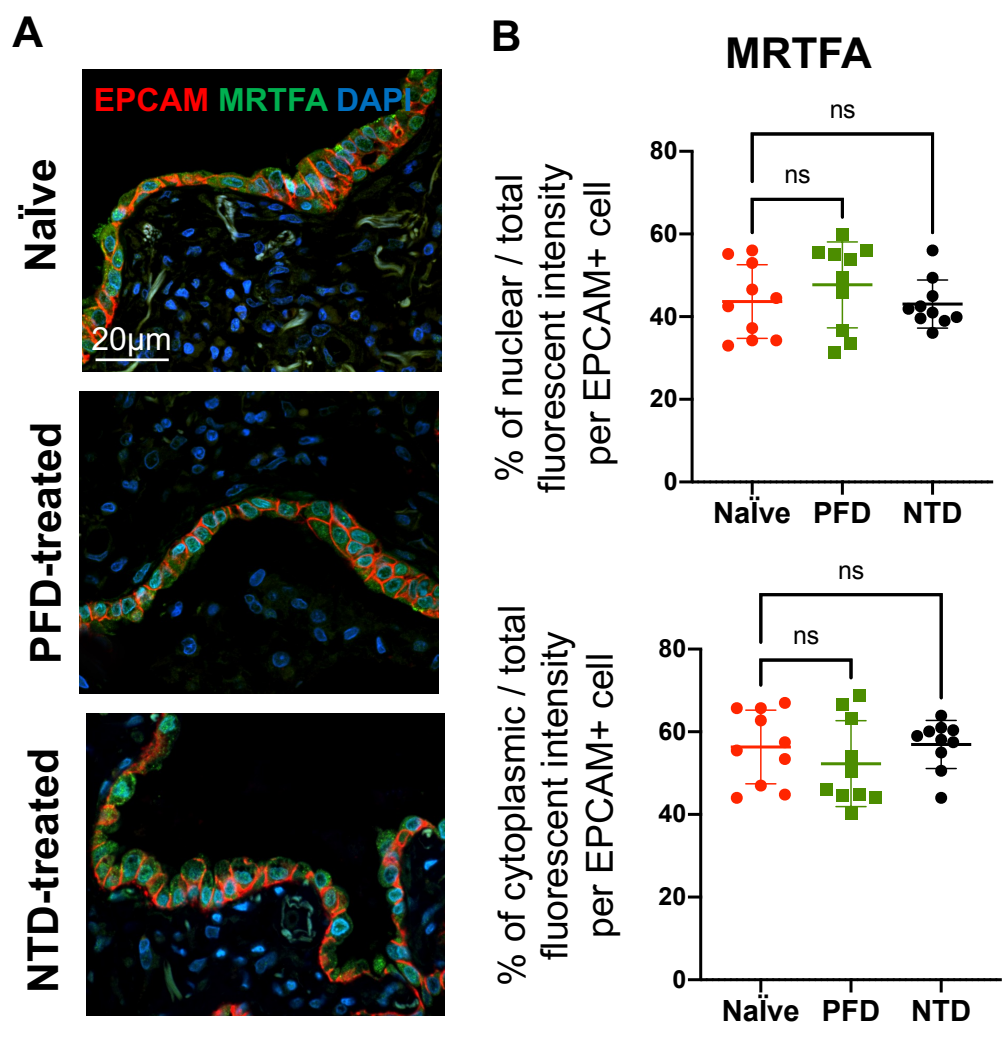

**Table S1**

| Sample | Diagnosis | Gender | Age | Ethnicity | Drug therapy |
|--------|-----------|--------|-----|-----------|--------------|
| N1     | Normal    | Male   | 61  | Caucasian | NA           |
| N2     | Normal    | Male   | 76  | Caucasian | NA           |
| N3     | Normal    | Male   | 34  | Caucasian | NA           |
| N4     | Normal    | Female | 60  | Caucasian | NA           |
| I1     | IPF       | Male   | 63  | Caucasian | None         |
| I2     | IPF       | Male   | 68  | Hispanic  | Nintedanib   |
| I3     | IPF       | Female | 58  | Caucasian | None         |
| I4     | IPF       | Male   | 69  | Caucasian | None         |
| I5     | IPF       | Female | 56  | Caucasian | None         |
| I6     | IPF       | Male   | 70  | Caucasian | Pirfenidone  |
| I7     | IPF       | Male   | 65  | Caucasian | None         |
| I8     | IPF       | Male   | 71  | Caucasian | Nintedanib   |
| I9     | IPF       | Male   | 59  | Hispanic  | None         |
| I10    | IPF       | Female | 66  | Caucasian | Pirfenidone  |



**Table S2**

| Primer           | Sequence                  |
|------------------|---------------------------|
| <i>hHPRT-F</i>   | CTCATGGACTGATTATGGACAGGAC |
| <i>hHPRT-R</i>   | GCAGGTCAGCAAAGAACTTATAGCC |
| <i>hCOL1A1-F</i> | CAGACTGGCAACCTCAAGAA      |
| <i>hCOL1A1-R</i> | CAGTGACGCTGTAGGTGAAG      |
| <i>hCOL1A2-F</i> | GTTGCTGCTTGCAGTAACCTT     |
| <i>hCOL1A2-R</i> | AGGGCCAAGTCCAACCTCCTT     |
| <i>hCOL3A1-F</i> | GGAGCTGGCTACTTCTCGC       |
| <i>hCOL3A1-R</i> | GGGAACATCCTCCTTCAACAG     |
| <i>hCD31-F</i>   | AACAGTGTTGACATGAAGAGCC    |
| <i>hCD31-R</i>   | TGTAAAACAGCACGTCATCCTT    |
| <i>hEPCAM-F</i>  | AATCGTCAATGCCAGTGTACTT    |
| <i>hEPCAM-R</i>  | TCTCATCGCAGTCAGGATCATAA   |
| <i>hACTA2-F</i>  | GACCGAATGCAGAAGGAGAT      |
| <i>hACTA2-R</i>  | CACCGATCCAGACAGAGTATTT    |
| <i>hMYL9-F</i>   | TCTTCGCAATGTTTGACCAGT     |
| <i>hMYL9-R</i>   | GTTGAAAGCCTCCTTAAACTCCT   |
| <i>hACTA1-F</i>  | GGCATTACGAGACCACTAC       |
| <i>hACTA1-R</i>  | CGACATGACGTTGTTGGCATA     |
| <i>hACTG2-F</i>  | GCTGTAGCACCTGAAGAG        |
| <i>hACTG2-R</i>  | GAATGGCGACGTACATGGCA      |
| <i>hCFL1-F</i>   | GAGACCAAGGAG AGCAAGAAG    |
| <i>hCFL1-R</i>   | GTCTTGAGCTGGCATAAA        |
| <i>hTPM4-F</i>   | CTGAGACCCGTGCTGAAT TT     |
| <i>hTPM4-R</i>   | AGCCACGTTCTCTTCTTTG       |
| <i>hCTGF-F</i>   | GCCCAGACCCAACCTATGATTAG   |
| <i>hCTGF-R</i>   | GGAGGCGTTGTCATTGGTAA      |
| <i>hFOSL1-F</i>  | CAGGCGGAGACTGACAAACTG     |
| <i>hFOSL1-R</i>  | TCCTTCCGGGATTTTGCAGAT     |
| <i>hAAAS-F</i>   | GGCCTTTTTGGGGTGCTAAAT     |
| <i>hAAAS-R</i>   | TGGGCAAATTCAGCGATCAGA     |
| <i>hETF1-F</i>   | ATACAGAGGCTCTTACAGCACT    |
| <i>hETF1-R</i>   | AATTTGTGCAGGACTTCTCTTGT   |
| <i>hANKRD1-F</i> | AGTAGAGGAACCTGGTCACTGG    |
| <i>hANKRD1-R</i> | TGTTTCTCGCTTTTCCACTGTT    |
| <i>hAXL-F</i>    | CCGTGGACCTACTCTGGCT       |
| <i>hAXL-R</i>    | CCTTGGCGTTATGGGCTTC       |
